# Supplementary material for: Onsite microbiome analysis of stromatolite-like silica structures in a remote subterranean analog martian environments
Source: Copernicus journal article supplement (doi:10.5194/egusphere-2025-2224), 2025-05-28
Supplement: Supplementary file 1 [file egusphere-2025-2224-supplement.pdf]

Supplementary File

A

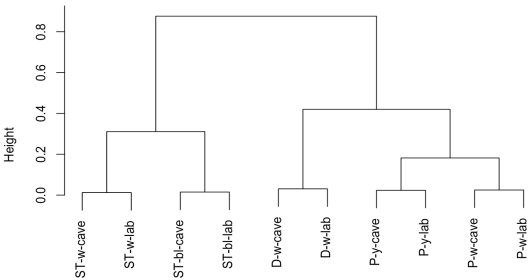

B

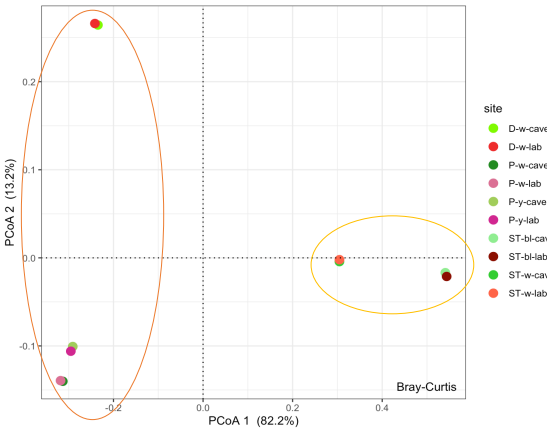

**Figure S1: Comparison between the results obtained using the Cave\_ and Lab\_pipeline in terms of beta-diversity. Cluster dendrogram (A) and Principal coordinates analysis (B) of Bray-Curtis dissimilarities of all the samples analysed using cave\_pipeline (names with “-cave”) and lab\_pipeline (names with “-lab”)**

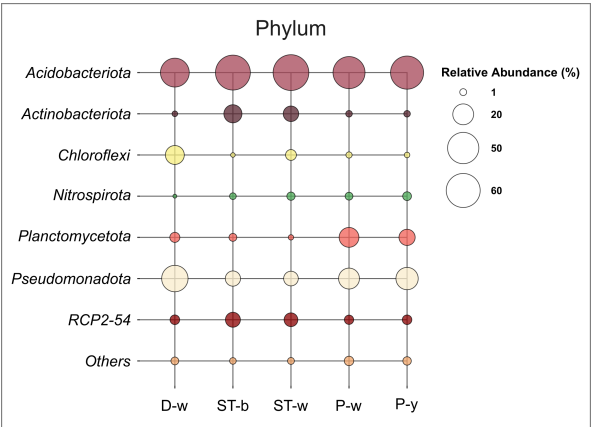

**Figure S2: Bubble plot showing the most abundant microbial taxa in each sample at the phylum level.**

**Table S1: Description of the samples collected in Imawari Yeuta cave, including samples number, barcode association and sampling site characteristics**

| Sample code | Description                                                                                                          |
|-------------|----------------------------------------------------------------------------------------------------------------------|
| D-w         | White dots with dendritic aspect, similar to Qz samples that were previously described in Ghezzi et al. (2021, 2022) |
| P-y         | Yellow patina/biofilm on the quartzite floor of Imawari Yeutà                                                        |
| P-w         | White patina/biofilm on the quartzite floor of Imawari Yeutà immediately around the yellow patina                    |
| ST-w        | White colonies/patina at the interface of the silica stromatolite with the quartzite rock                            |
| ST-b        | Blackish/greyish patina covering the top part of the silica stromatolite                                             |

**Table S2: Description of the main characteristics of the two pipelines that were applied to analyse the ONT sequencing data including rate of subsampling, basecalling applied, internet need, and time to process 100k row reads**

|                                | Cave_procedure                  | Lab_procedure                   |
|--------------------------------|---------------------------------|---------------------------------|
| Subsampling                    | 25%                             | 100%                            |
| Basecalling mode               | Fast <sup>a</sup>               | Accurate                        |
| Internet connection            | Not needed                      | Preferable <sup>b</sup>         |
| Taxonomy classification        | EMU classifier (Silva database) | EMU classifier (Silva database) |
| Time to process 100k raw reads | Ca. 10 min <sup>c</sup>         | Ca. 45 min - 1 h                |

<sup>a</sup> Basecalling was directly performed during the sequencing run by the MinK1C Minion

Internet connection is needed with computers/laptops with standard computational capacity

<sup>c</sup> Carrying out the subsampling

**Table S3: Ecoplate carbon sources classification**

| Biochemical classification | Compounds                            |
|----------------------------|--------------------------------------|
| Carbohydrates              | B-Methyl-D-Glucoside                 |
|                            | D-Xylose                             |
|                            | i-Erythritol                         |
|                            | D-Mannitol                           |
|                            | N-Acetyl-D-Glucosamine               |
|                            | D-Cellobiose                         |
|                            | Glucose-1-Phosphate                  |
|                            | $\alpha$ -D-Lactose                  |
|                            | D,L- $\alpha$ -Glycerol Phosphate    |
| Carboxylic acid            | D- Galactonic Acid $\gamma$ -Lactone |
|                            | Pyruvic Acid Methyl Ester            |

|                        |                              |
|------------------------|------------------------------|
|                        | D-Galacturonic Acid          |
|                        | 2-Hydroxy Benzoic Acid       |
|                        | 4-Hydroxy Benzoic Acid       |
|                        | $\gamma$ -Amino Butyric Acid |
|                        | D-Glucosaminic Acid          |
|                        | Itaconic Acid                |
|                        | $\alpha$ -Keto Butyric Acid  |
|                        | D-Malic Acid                 |
| Complex carbon sources | Tween 40                     |
|                        | Tween 80                     |
|                        | $\alpha$ -Cyclodextrin       |
|                        | Glycogen                     |
| Amino acids            | L-Arginine                   |
|                        | L-Asparagine                 |
|                        | L-Phenylalanine              |
|                        | L-Serine                     |
|                        | L-Threonine                  |
|                        | Glycyl-L-Glutamic Acid       |
| Amines                 | Phenylethyl-amine            |
|                        | Putrescine                   |

**Table S4: Description of the raw sequencing data obtained by processing ONT sequencing reads obtained in the cave using the Cave\_pipeline and Lab\_pipeline**

| Sample | Cave_pipeline      |                |                       | Lab_pipeline       |                |                       |
|--------|--------------------|----------------|-----------------------|--------------------|----------------|-----------------------|
|        | # basecalled reads | Filtered reads | # reads mapped by EMU | # basecalled reads | Filtered reads | # reads mapped by EMU |
| P-y    | 117509             | 27233          | 27231                 | 105820             | 97993          | 97980                 |
| P-w    | 102785             | 24244          | 24240                 | 94623              | 88661          | 88649                 |
| ST-w   | 132029             | 24476          | 24463                 | 113894             | 86442          | 86397                 |
| ST-bl  | 63345              | 13473          | 13466                 | 56284              | 48034          | 48023                 |
| D-w    | 135197             | 32719          | 32715                 | 124739             | 119934         | 119917                |

**Table S5: Statistical analysis of the correlation between the cave and lab datasets for each sample considering the whole dataset using Chi-square goodness of fit test**

| Sample/Barcode | p-value <sup>a</sup> |        |        |        |        |
|----------------|----------------------|--------|--------|--------|--------|
|                | Taxonomy level       |        |        |        |        |
|                | Phylum               | Class  | Order  | Family | Genus  |
| P-y            | >0.99*               | >0.99* | >0.99* | >0.99* | >0.99* |
| P-w            | >0.99*               | >0.99* | >0.99* | >0.99* | >0.99* |
| ST-w           | >0.99*               | >0.99* | >0.99* | >0.99* | >0.99* |
| ST-b           | >0.99*               | >0.99* | >0.99* | >0.99* | >0.99* |
| D-w            | >0.99*               | >0.99* | >0.99* | >0.99* | >0.99* |

<sup>a</sup> Calculated through Chi-square goodness of fit test setting the null hypothesis (H0) = the two samples are NOT significantly different

\* Values for which H0 is NOT rejected, the two datasets are not statistically different

**Table S6: Shannon index values calculated using the results obtained from the cave\_pipeline and the lab\_pipeline**

| Sample/Barcode | Shannon index |      |       |      |       |      |        |      |       |      |
|----------------|---------------|------|-------|------|-------|------|--------|------|-------|------|
|                | Phylum        |      | Class |      | Order |      | Family |      | Genus |      |
|                | CAVE          | LAB  | CAVE  | LAB  | CAVE  | LAB  | CAVE   | LAB  | CAVE  | LAB  |
| P-y            | 1.31          | 1.33 | 1.46  | 1.48 | 2.51  | 2.55 | 2.68   | 2.72 | 2.86  | 2.91 |
| P-w            | 1.41          | 1.42 | 1.57  | 1.62 | 2.58  | 2.64 | 2.78   | 2.84 | 2.96  | 3.01 |
| ST-w           | 1.17          | 1.19 | 1.25  | 1.27 | 1.83  | 1.86 | 1.84   | 1.88 | 1.92  | 1.96 |
| ST-bl          | 1.18          | 1.19 | 1.29  | 1.28 | 1.51  | 1.52 | 1.52   | 1.53 | 1.57  | 1.58 |
| D-w            | 1.36          | 1.37 | 1.58  | 1.60 | 2.49  | 2.52 | 2.67   | 2.70 | 3.04  | 3.03 |

**Table S7: Percentage of Amplicon sequence variants (ASV) unclassified at all taxonomy levels in each sample**

| Sample/Barcode | Unclassified ASVs % |       |       |        |       |
|----------------|---------------------|-------|-------|--------|-------|
|                | Taxonomy level      |       |       |        |       |
|                | Phylum              | Class | Order | Family | Genus |
| P-y            | <0.001              | 3.30  | 5.64  | 59.91  | 79.99 |
| P-w            | <0.001              | 3.32  | 5.91  | 54.12  | 78.67 |
| ST-w           | <0.001              | 8.07  | 10.08 | 79.25  | 86.67 |
| ST-b           | <0.001              | 9.67  | 15.71 | 84.26  | 90.18 |
| D-w            | <0.001              | 3.54  | 4.92  | 45.12  | 66.97 |
